# Supplementary material for: Electro-precipitation via oxygen reduction: a new technique for thin film manganese oxide deposition
Source: Royal Society of Chemistry journal article supplement (doi:10.1039/c6ta03471c), 2016-01-01
Supplement: c6ta03471c1.pdf [file c6ta03471c1.pdf]

# Electronic Supplementary Information: electro-precipitation via oxygen reduction: a new technique for thin film manganese oxide deposition

Gijs Vanhoutte,<sup>\*a</sup> Minxian Wu,<sup>a</sup> Stijn Schaltin,<sup>a</sup> Felix Mattelaer,<sup>b</sup> Christophe Detavernier,<sup>b</sup> Philippe M. Vereecken,<sup>c</sup> Koen Binnemans,<sup>d</sup> and Jan Fransaer<sup>\*a</sup>

Received Xth XXXXXXXXXXXX 20XX, Accepted Xth XXXXXXXXXXXX 20XX

First published on the web Xth XXXXXXXXXXXX 200X

DOI: 10.1039/b000000x

The electrochemical behavior was investigated by cyclic voltammetry without dissolved oxygen in solution, thus only the Mn-ions are studied. Cyclic voltammetry was measured at room temperature, using a platinum disk ( $\phi = 1.5$  mm) as working electrode. First of all the electrochemical window of DMSO was measured without the presence of manganese ions (Figure S4, red). It can be seen that DMSO is stable over a wide potential range from -4.0 to +1.0 V vs. Ag/Ag<sup>+</sup>. When 0.1 M of Mn<sup>2+</sup>-ions are added in the form of Mn(Tf<sub>2</sub>N)<sub>2</sub>, cyclic voltammograms were scanned from open circuit potential (OCP) to the negative vertex potential, to the positive vertex potential and back to the OCP at a scan rate of 50 mV s<sup>-1</sup>. Figure S4 shows one reduction peak at -0.97 V vs. Ag/Ag<sup>+</sup> with a current density of  $-2.4 \times 10^{-2}$  A dm<sup>-2</sup> and one oxidation peak (a<sub>1</sub>) at -0.37 V vs. Ag/Ag<sup>+</sup> and  $0.68 \times 10^{-2}$  A dm<sup>-2</sup>. These peaks correspond with the deposition of Mn<sup>0</sup> from Mn<sup>2+</sup> and the dissolution according to reaction. The manganese metal deposition was confirmed by applying a potential of -3.0 V vs. Ag/Ag<sup>+</sup> for 300 s, resulting in a cauliflower-like deposit (Figure S5). The electro-precipitation of Mn<sub>x</sub>O<sub>y</sub> was investigated by EQCM using cyclic voltammetry (Figure S6) and XRD (Figure S7 and S8). In Figure S7 the integrated intensity at 26° – 28° was plotted, it can be seen that the intensity decreases with increasing temperature and increases again upon cooling down. The temperature at which Mn<sub>2</sub>O<sub>3</sub> starts to crystallize is 495.8C, here the intensity suddenly increases (Figure S8).

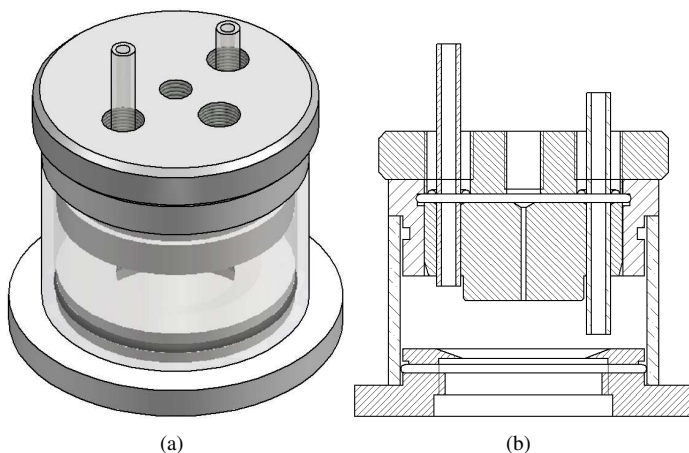

**Fig. 1** Design of the EQCM setup: the lid has four entries, an oxygen inlet and outlet and two feed-throughs for the reference and counter electrode. The cell is sealed with Kalrez O-rings and can be screwed on a commercial Mactex RQCM-crystal holder.

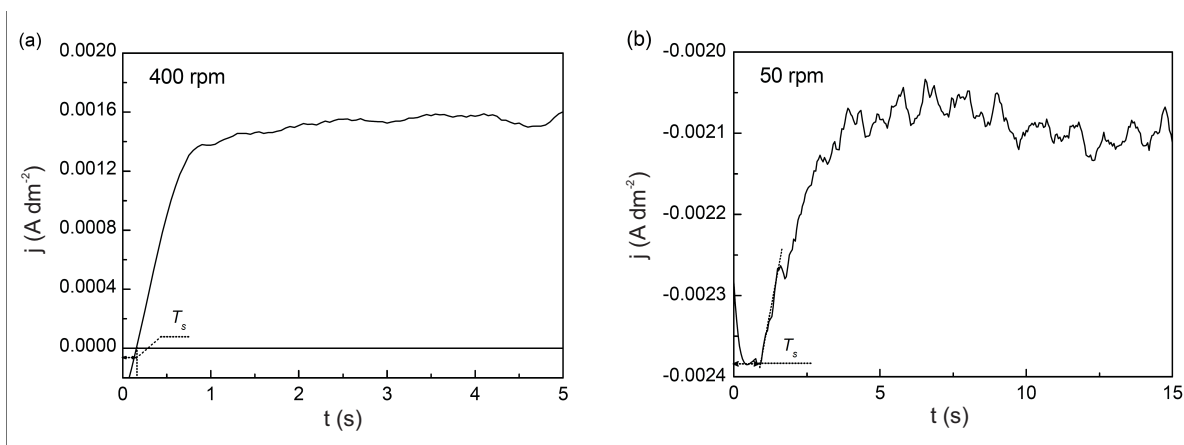

**Fig. 2** The transient time in an oxygen-saturated 1 M TBAP solution in DMSO at room temperature. The disk potential was stepped from open circuit to  $-1.6$  V (vs.  $\text{Ag}/\text{Ag}^+$ ) and the ring potential was held at (a)  $+0.3$  V or at (b)  $-1.6$  V (vs.  $\text{Ag}/\text{Ag}^+$ ).

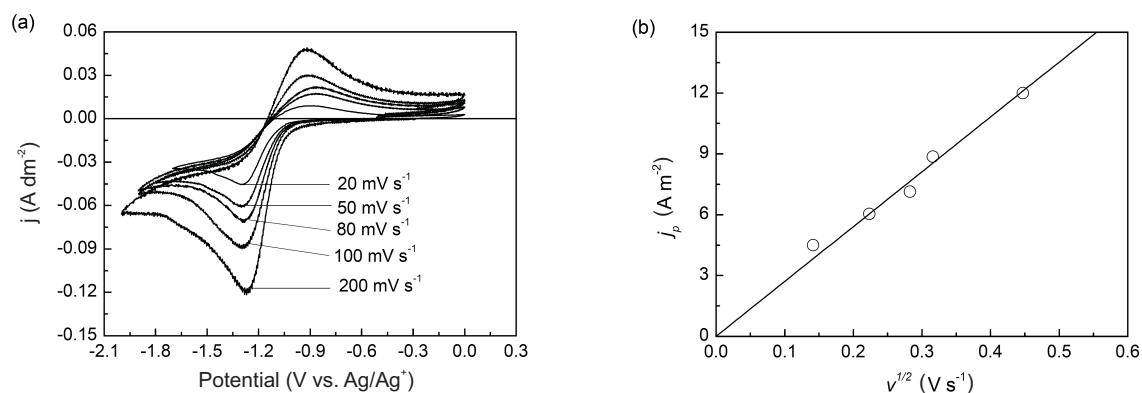

**Fig. 3** Cyclic voltammograms of the oxygen-saturated 1 M TBAP solution in DMSO with different scan rates (a) and the plot of peak current density with the square root of scan rate (b). The working electrode was a glassy carbon disk ( $\phi = 1$  mm), and the counter electrode was a platinum coil.

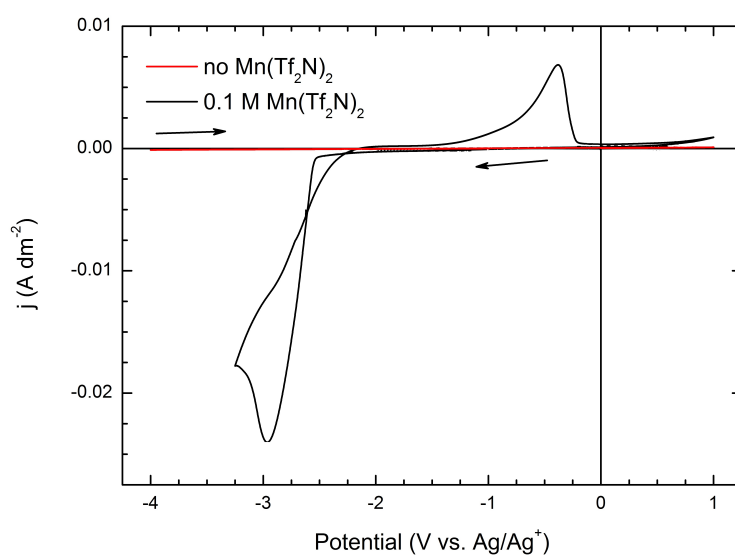

**Fig. 4** Cyclic voltammograms of a DMSO solution containing no manganese salt (a, red) or 0.1 M Mn(Tf<sub>2</sub>N)<sub>2</sub> (a, black). The working electrode was a platinum disk ( $\phi = 1.5$  mm) The real reference electrode was a silver wire in a glass tube with frit, filled with 0.1 M Ag(NO<sub>3</sub>) and 1 M LiTf<sub>2</sub>N in DMSO. The counter electrode was a platinum coil and the scan rate was 50 mV s<sup>-1</sup>.

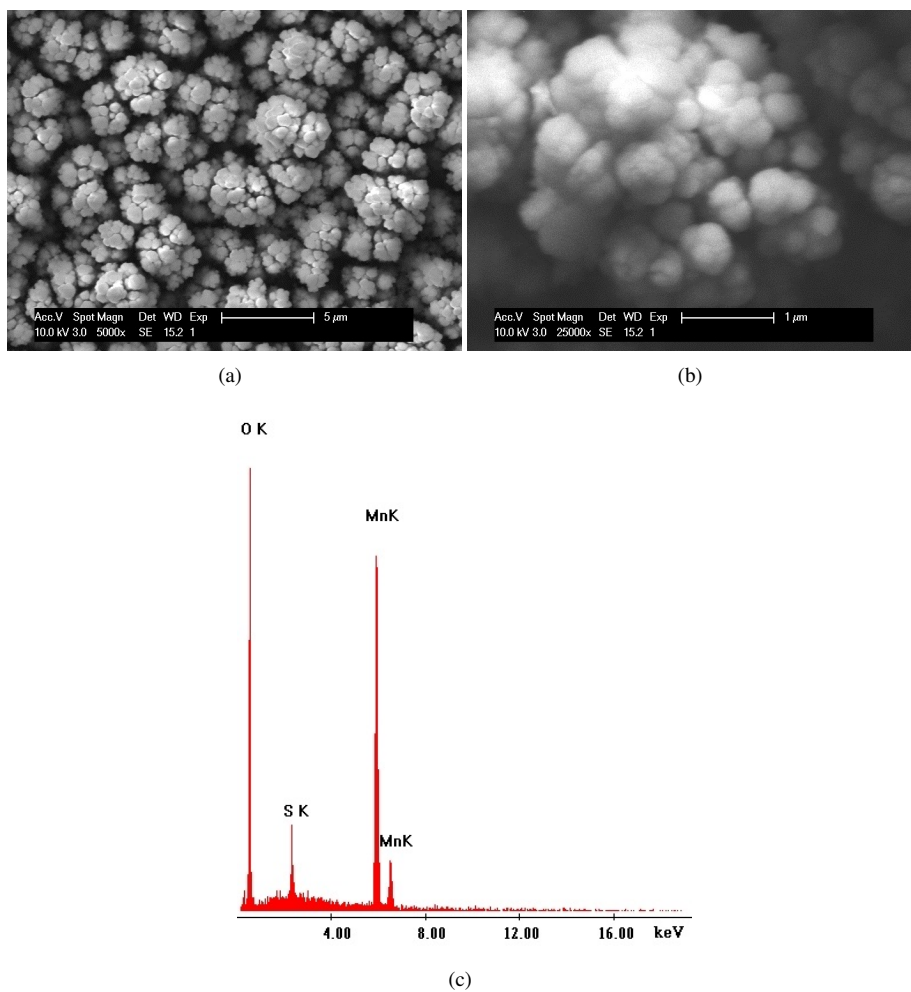

**Fig. 5** SEM and EDX analysis of a potentiostatic deposition of manganese from a 0.1 M  $\text{Mn}(\text{Tf}_2\text{N})_2$  DMSO solution. The potential was held at -3.0 V vs.  $\text{Ag}/\text{Ag}^+$  for 300 s and a platinum coated silicon wafer was used as substrate while the electrolyte was stirred.

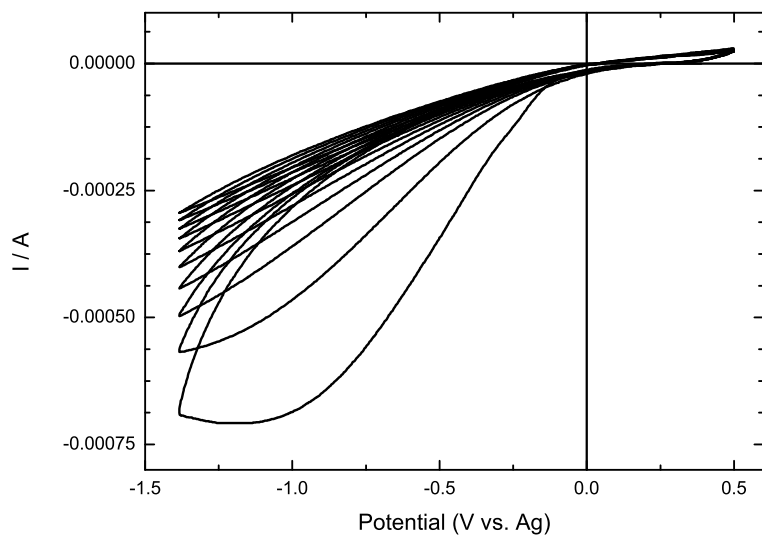

**Fig. 6** Cyclic voltammograms of a DMSO solution with dissolved oxygen and 0.1 M  $\text{Mn}(\text{Tf}_2\text{N})_2$ . The working electrode was an AT cut platinum coated quartz crystal with an active surface area of  $1.27 \text{ cm}^2$ . The reference electrode was a silver wire directly immersed in the electrolyte. The counter electrode was a platinum coil and the scan rate was  $50 \text{ mV s}^{-1}$ .

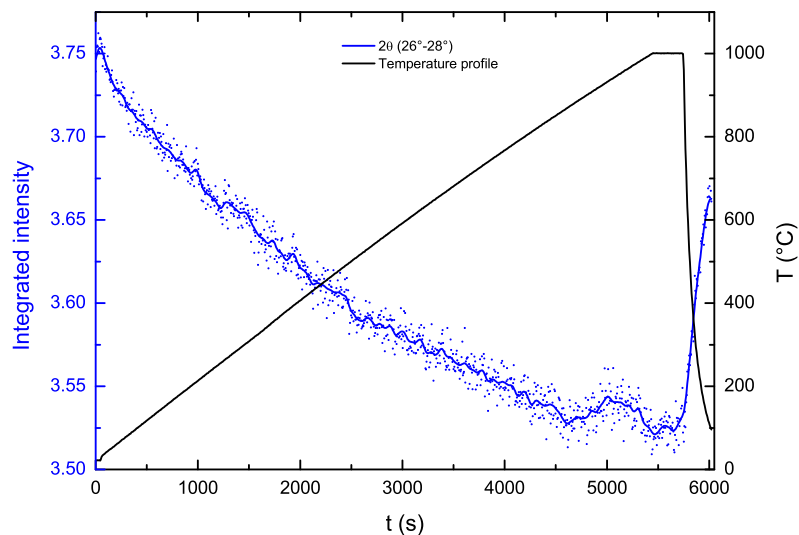

**Fig. 7** Integrated intensity of the XRD pattern of  $\text{MnO}_2$  at  $26^\circ - 28^\circ$ . The intensity increases upon cooling at 5740 s.

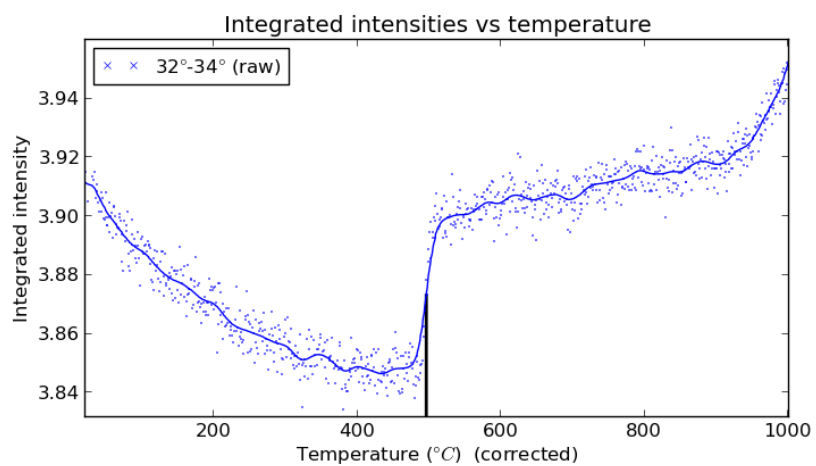

**Fig. 8** Integrated intensity of the XRD pattern of  $\text{Mn}_2\text{O}_3$  at  $32^\circ - 34^\circ$ . The intensity increases at  $496^\circ\text{C}$ , where  $\text{Mn}_2\text{O}_3$  starts to crystallize.

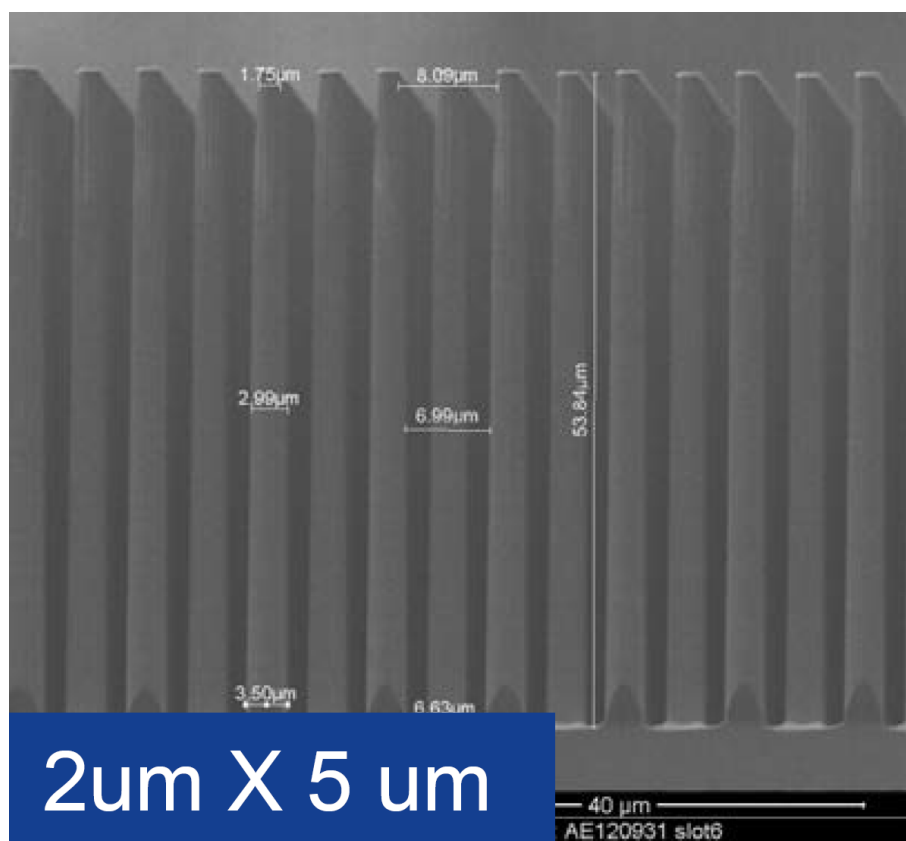

**Fig. 9** 3D silicon pillars coated with TiN as current collector.

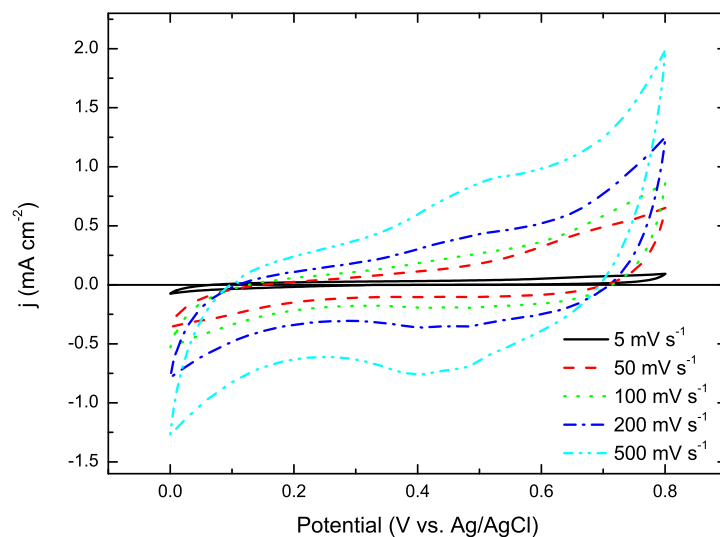

**Fig. 10** Capacitance measured via cyclic voltammetry in 0.5 M K<sub>2</sub>SO<sub>4</sub> aqueous electrolyte using a Pt counter electrode and Ag/AgCl reference electrode. A Mn<sub>x</sub>O<sub>y</sub> thin film of approx. 80 nm was deposited on a planar Pt working electrode. The capacitance was measured at various scan rates from 5 - 500 mV s<sup>-1</sup>.

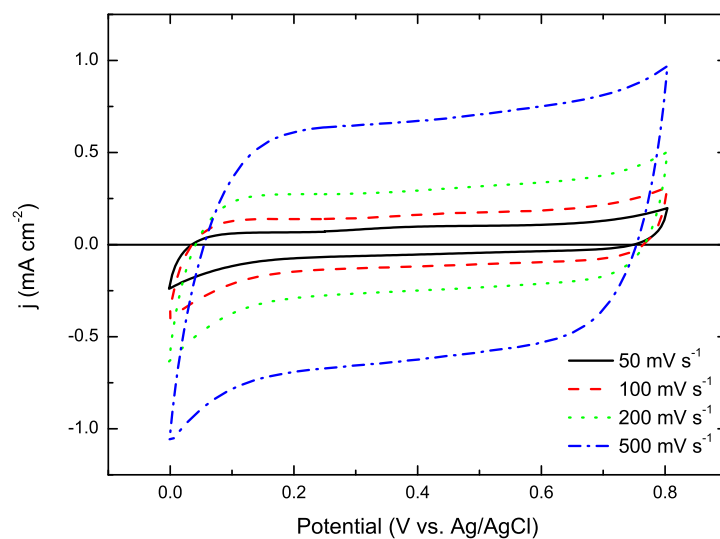

**Fig. 11** Capacitance measured via cyclic voltammetry in 0.5 M K<sub>2</sub>SO<sub>4</sub> aqueous electrolyte using a Pt counter electrode and Ag/AgCl reference electrode. A Mn<sub>x</sub>O<sub>y</sub> thin film was deposited on a planar working electrode coated with carbon nanosheets (height 20 - 70 nm). The capacitance was measured at various scan rates from 50 - 500 mV s<sup>-1</sup>.

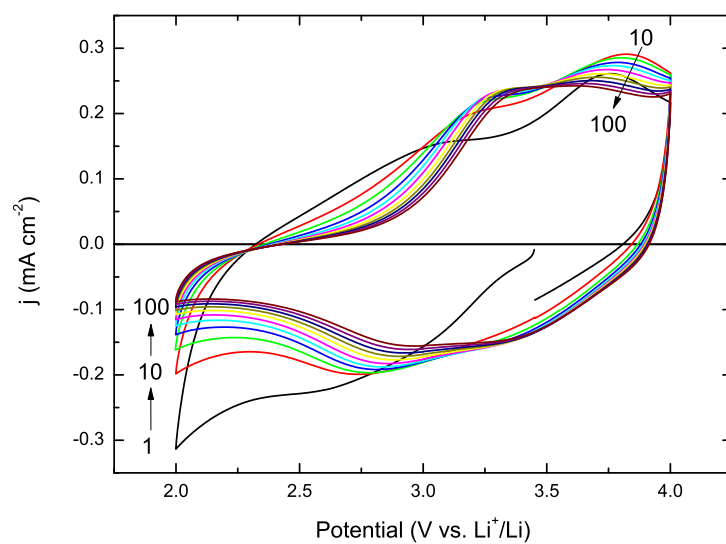

**Fig. 12** Lithiation/delithiation of 300 nm  $\text{Mn}_x\text{O}_y$  thin film on a planar working electrode coated with carbon nanosheets (height 2  $\mu\text{m}$ ) using cyclic voltammetry. A lithium reference and counter electrode was used and as electrolyte a 1 M  $\text{LiClO}_4$  in anhydrous propylene carbonate solution.
